1           **Entrainment and maintenance of an internal metronome in premotor cortex**

2

3   Cadena-Valencia J<sup>1</sup>, García-Garibay O<sup>1</sup>, Merchant H<sup>1</sup>, Jazayeri M<sup>2</sup>, de Lafuente V<sup>1</sup>.

4

5   1. Institute of Neurobiology, National Autonomous University of Mexico. Boulevard Juriquilla  
6   3001, Querétaro, QRO., México, 76230.

7   2. McGovern Institute for Brain Research, Massachusetts Institute of Technology, Cambridge,  
8   MA, USA.

9

10   Corresponding author: Victor de Lafuente

11   email: [lafuente@unam.mx](mailto:lafuente@unam.mx)

12   phone: +52 (442) 238-1048.

13

14   **Keywords:** Rhythm perception, supplementary motor area, local field potential, non-human  
15   primates, timing.

16

17 **Abstract**

18 To prepare timely motor actions we constantly predict future events. Regularly repeating  
19 events are often perceived as a rhythm to which we can readily synchronize our movements,  
20 just as in dancing to music. However, the neuronal mechanisms underlying the capacity to  
21 encode and maintain rhythms are not understood. We trained nonhuman primates to maintain  
22 the rhythm of a visual metronome of different tempos and then we recorded neural activity in  
23 the supplementary motor area (SMA). SMA exhibited rhythmic bursts of gamma band (30-40  
24 Hz) reflecting an internal tempo that matched the extinguished visual metronome. Moreover,  
25 gamma amplitude increased throughout the trial and provided an estimate of total elapsed  
26 time. Notably, the timing and amplitude of gamma bursts reflected systematic timing biases  
27 and errors in the behavioral responses. Our results indicate that premotor areas use dynamic  
28 motor plans to encode a metronome for rhythms and a stopwatch for total elapsed time.

## 29 Introduction

30 Adaptive behavior benefits from the ability to discern temporal regularities in the environment.  
31 To exploit these regularities, the brain must be able to measure time intervals between  
32 repetitive events (Buhusi and Meck 2005; de Lafuente, Jazayeri, and Shadlen 2015; Confais et  
33 al. 2012; Leon and Shadlen 2003), and use this timing information to anticipate future events  
34 (Goel and Buonomano 2014; Jazayeri and Shadlen 2010; Uematsu, Ohmae, and Tanaka  
35 2017). This behavior is evident when we dance to music, which requires perceiving rhythms  
36 and generating movements in sync with them (Levitin, Grahn, and London 2018). Nonhuman  
37 primates and other vertebrates are capable synchronizing their movements to periodic rhythms  
38 (Merchant et al. 2013; Takeya et al. 2017), and we recently showed that monkeys can  
39 internally maintain rhythms of different tempos in the absence of overt motor actions (García-  
40 Garibay et al. 2016). Ample evidence indicates that cortical and subcortical motor circuits  
41 participate in behavioral tasks that require time perception and temporally precise behavioral  
42 responses (Mita et al. 2009; Crowe et al. 2014; Bartolo, Prado, and Merchant 2014; Merchant  
43 and Averbeck 2017; Grahn and Brett 2007; Ivry 2004; Murray et al. 2014). Nonetheless the  
44 neuronal mechanisms that allow motor structures to encode rhythms of different tempos, in the  
45 absence of motor commands, are not yet completely understood.

46

47 We developed a novel visual metronome task in which nonhuman primates had to observe,  
48 and then internally maintain, a temporal rhythm defined by a *left-right* alternating visual  
49 stimulus. Crucially, subjects performed had to track the rhythm in the absence of overt  
50 movements (García-Garibay et al. 2016). By uncoupling rhythm encoding and maintenance  
51 from motor actions, we aimed to identify the mechanism that allows the brain to internally

52 maintain rhythms of different tempos. While monkeys performed the task, we recorded the  
53 local field potentials (LFPs) and spiking activity of single neurons in the supplementary motor  
54 area (SMA) that has been implicated in timing and rhythm perception (Buzsáki, Anastassiou,  
55 and Koch 2012; Pesaran et al. 2002). Our results show that bursts of lower gamma band  
56 activity (30-40 Hz) reflect the internally maintained tempos by a simple mechanism: the  
57 intervals defining the rhythm are encoded by the periodic onset of gamma bursts. Moreover,  
58 increasing amplitudes of gamma bursts reflected an estimate of total elapsed time (i.e. the total  
59 time since the rhythm began). Importantly, gamma bursts encoded both rhythm and the total  
60 elapsed time in the absence of sensory stimulation and overt motor activity.

61

## 62 **Results**

### 63 **Monkeys can perceive rhythms and maintain them internally**

64 We trained two rhesus monkeys (*M. mulatta*) to perform a visual metronome task (Figure 1A).  
65 While maintaining eye and hand fixation over the screen, monkeys saw a visual stimulus that  
66 appeared on one side, switched to the other, and the back to the initial location. This  
67 alternating stimulus defined three *entrainment* intervals of an isochronous rhythm. On each  
68 trial the interval duration was pseudo-randomly chosen to be 500, 750, or 1000 ms. In this  
69 manner, animals were presented with a visual metronome whose tempo was changed on a  
70 trial-by-trial basis (Figure 1A).

71

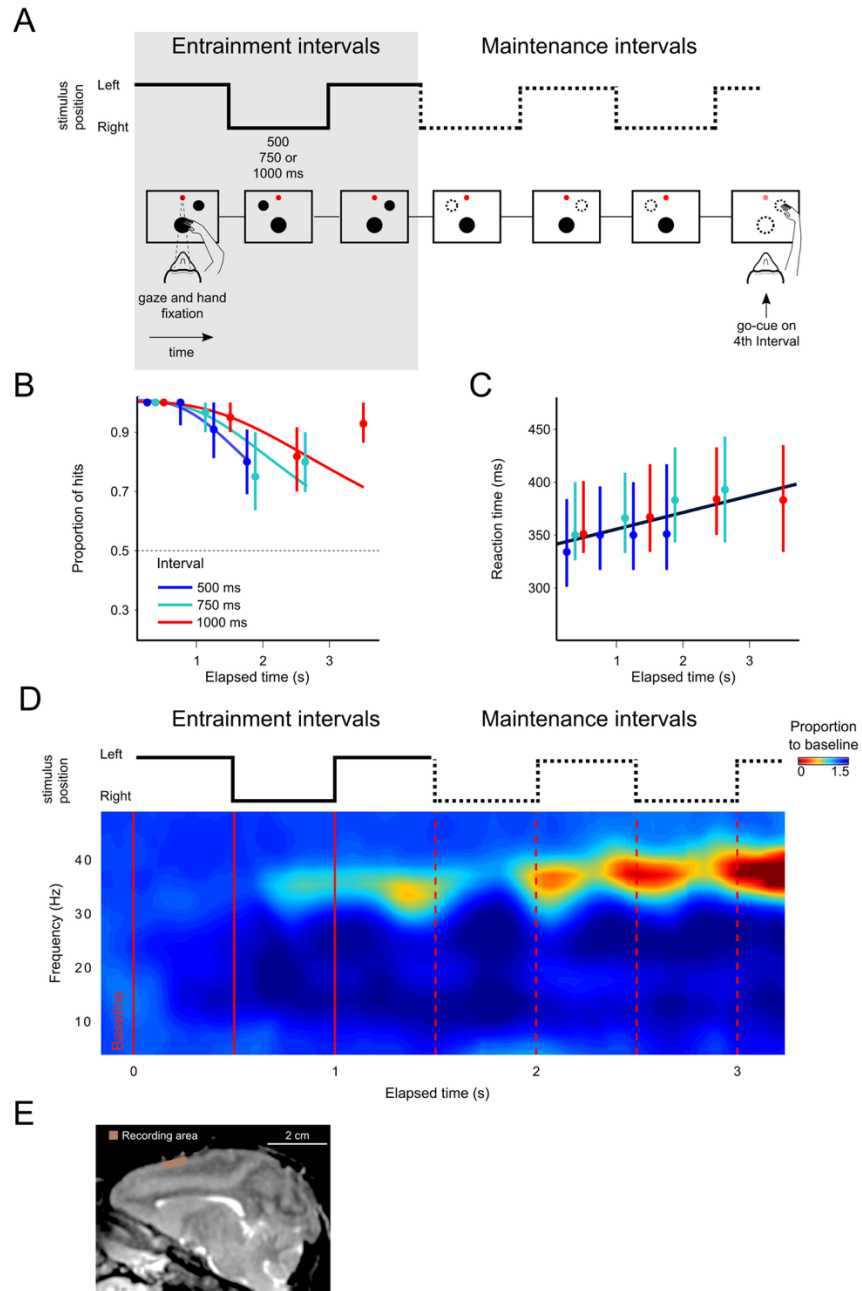

72

73 **Figure 1. The visual metronome task.**

74 **(A)** Rhythms of different tempos were defined by a left-right alternating visual stimulus that appeared on a touch  
75 screen. While keeping eye and hand fixation, subjects first observed three isochronous *entrainment* intervals with  
76 duration of either 500, 750, or 1000 ms (pseudo-randomly selected on each trial). After the last *entrainment*  
77 interval, the visual stimulus disappeared initiating the *maintenance* intervals, during which the subjects had to  
78 keep track of the stimulus' virtual location (left of right, broken lines). A *go-cue* (extinction of the hand fixation) at

79 the middle of one of the four *maintenance* intervals prompted the subjects to reach towards the estimated location  
80 of the stimulus. It is important to note that this was not an interception task because the left-right switching  
81 stopped at the time of the *go-cue*. Monkeys received a liquid reward when correctly indicating the stimulus  
82 location.

83 **(B)** The proportion of correct responses is plotted as a function of elapsed time during the *maintenance* intervals.  
84 Colors indicate the performance for the three tempos (500, 750, 1000 ms). Performance was significantly above  
85 chance (broken line at  $p=0.5$ ; z-test  $p<0.001$ ;  $n=131$  sessions; median  $\pm$  I.Q.R. over sessions). The decrease in  
86 performance as a function of elapsed time is expected from variability of the subjects' internal timing in the  
87 absence of the external visual rhythm. This drop in performance was captured by a model of timing subject to  
88 scalar variability (continuous lines).

89 **(C)** Reaction times to the *go-cue* increased as a function of elapsed time ( $n=131$  sessions; median  $\pm$  I.Q.R. over  
90 sessions). Black line indicates a linear regression on the median reaction times (dots).

91 **(D)** Mean spectrogram across recording sessions and subjects (500 ms interval). The step traces at the top  
92 indicate the stimulus position as a function of time, for *entrainment* and *maintenance* intervals. Signal amplitude  
93 was normalized with respect to a 500 ms *baseline* period before stimulus presentation. A salient modulation of the  
94 LFP signal is observed around the gamma band (30-40 Hz). Gamma activity rhythmically increases in sync with  
95 the left-right transitions of the stimulus. Note also the increase in gamma activity as a function of total elapsed  
96 time.

97 **(E)** Recordings were made from the medial premotor area, also called the supplementary motor area (SMA). The  
98 recording chamber on monkey 1 (shown) was centered 23 mm anterior to Ear Bar Zero and 4 mm lateral to the  
99 midline, on the left hemisphere. The image shows a sagittal plane at 2 mm lateral from the middle.

100

101 After the third *entrainment* interval, the visual stimulus disappeared, and subjects had to  
102 maintain the rhythm internally by keeping track of the virtual position (left or right) of the  
103 stimulus as a function of elapsed time. To test the ability of subjects to maintain the rhythms, a  
104 *go-cue* at the middle of any one of up to four *maintenance* intervals instructed the subjects to  
105 reach towards the stimulus location (the *go-cue* consisted of removing the hand fixation point;

106 the number of *maintenance* intervals was pseudo-randomly chosen; Figure 1A). Thus, the key  
107 parameters in the visual metronome task were (1) interval duration (500, 750, or 1000 ms),  
108 and (2) the number of *maintenance* intervals that subjects had to wait before the visual  
109 stimulus was gone.

110

111 We characterized monkeys' ability to maintain the rhythms by plotting the proportion of correct  
112 responses as a function of the elapsed time since the initiation of the first *maintenance* interval  
113 (Figure 1B). The behavioral results show that monkeys satisfactorily performed the task and  
114 were able to correctly estimate the location of the stimulus in more than 80% of trials (94%  
115  $\pm 0.2\%$  monkey 1; 86%  $\pm 0.3\%$  monkey 2; mean  $\pm$  s.e. over sessions, n=131 sessions).

116

117 Importantly, performance as a function of time displays the hallmark of a timing task: the  
118 proportion of correct responses declines as a function of the number of *maintenance* intervals  
119 (or equivalently, elapsed time). The proportion of correct responses started close to 100% and  
120 declined to approximately 75% for the last *maintenance* intervals (last two data points for each  
121 curve). This behavior is consistent with the internal rhythm gradually drifting away from the true  
122 tempo of the stimulus (Gibbon et al. 1997; Grondin 2001). As we described in previous work  
123 (García-Garibay et al. 2016), this pattern is well captured by a model in which the subject's  
124 time estimates arise from increasingly noisy (wider) distributions, described by Weber's Law of  
125 time (also called the *scalar property* of timing) (Laje, Cheng, and Buonomano 2011). The  
126 increase in timing variability causes the subjects to eventually fall out of synchrony with the  
127 true stimulus position (getting ahead, or behind the true tempo), thus explaining the decrease  
128 in correct responses as a function of elapsed time (Figure 1B, the colored curves are fits of this  
129 model to the data; pooled data across monkeys).

130 Reaction times to the *go-cue* increases significantly in proportion to elapsed time within a  
131 narrow window ranging between 350 ms after the first maintenance interval of the fastest  
132 tempo (500 ms intervals) to 400 ms after the last interval of the slowest tempo (1000 ms  
133 intervals) (Figure 1C;  $R^2=0.72$ , slope=11 ms/s,  $p<0.001$ ; monkey 1 = 10.2 ms/s  $\pm$  0.8; monkey  
134 2=11.3 ms/s  $\pm$  0.5). This increase in reaction times could be a result of the increasing difficulty  
135 in estimating the true stimulus position. As expected by scalar variability, the subject's estimate  
136 of the stimulus position becomes noisier with time, thus increasing uncertainty and the reaction  
137 times necessary to make a decision. Overall, behavioral results show that monkeys were able  
138 to entrain to a rhythm, and maintain it in the absence of sensory stimuli, and importantly, in the  
139 absence of overt motor commands.

140

#### 141 **Gamma oscillations reveal the internally maintained rhythms**

142 While the monkeys performed the visual metronome task, we recorded neural activity in 131  
143 experimental sessions (84 and 47 for monkeys 1 and 2, respectively; Figure 1E), and analyzed  
144 the local field potentials (LFPs) within 5-80 Hz band. As a first step we calculated the mean  
145 spectrogram for both monkeys, across all recording sessions (Figure 1D; 500 ms interval  
146 shown; combined data across monkeys). Modulations of LFP amplitude were especially salient  
147 in the 30-40 Hz frequencies, which we will refer to as gamma band. In this band, LFP power  
148 was up to two-fold larger than the baseline activity recorded 500 ms before trial initiation  
149 ( $p<0.001$ ; permutation test of the time-frequency bins, 1000 permutations).

150

151 The LFP amplitude in the gamma band had a rhythmic structure. It increased markedly with  
152 the presentation of the last visible stimulus (3<sup>rd</sup> *entrainment* interval, Figure 1D), as well as



153 near the time when the non-visible stimulus would be switching its position from one side of the  
154 screen to the other during *maintenance* intervals (Figure 1D; broken red lines). To test this  
155 observation quantitatively, we verified that the average gamma amplitude at the time of  
156 switches was significantly higher than halfway between them (t-test,  $p < 0.01$  for the three  
157 tempos; window sizes  $1/4^{\text{th}}$  of interval length). In addition to the rhythmic modulation, gamma  
158 oscillations increased in amplitude as a function of total elapsed time (Figures 1D and 3C; note  
159 that the last *maintenance* interval displays the largest amplitude).

160  
161 The analyses so far focused on mean LFP activity across sessions. To gain further insight into  
162 the LFP dynamics supporting the maintenance of internal rhythms, we analyzed LFP amplitude  
163 modulations within single trials. The LFP recordings from single trials (band-passed at 30-40  
164 Hz) revealed short-duration bursts during which the oscillations transiently increase in  
165 amplitude (Figure 2B), consistent with recent findings in the prefrontal cortex (Lundqvist et al.  
166 2016). Importantly, we observed that during the *maintenance* epoch, these bursts tended to  
167 coincide with the times at which the stimulus would have changed position, as is shown by the  
168 peaks in the spectrogram of the example single trials (Figure 2A).

169

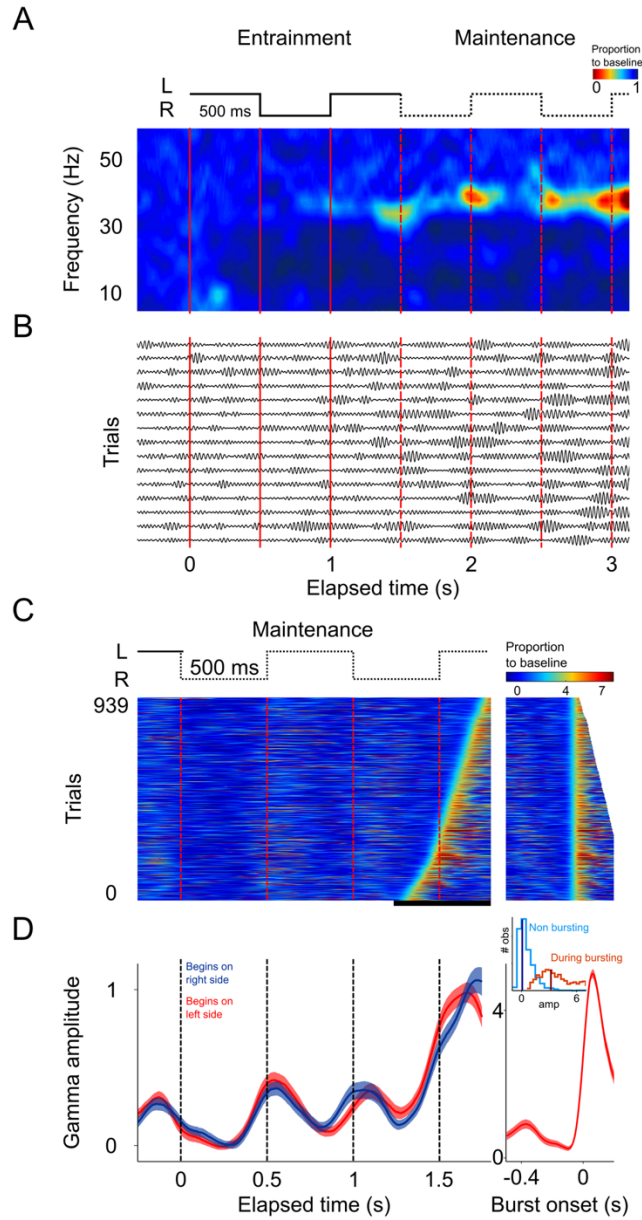

170

171 **Figure 2. Single trial analysis of the LFP.**

172 **(A)** Spectrogram of 15 single trials of the 500 ms interval. There is an increase in amplitude at the gamma band  
173 (30-40 Hz) particularly salient during *maintenance* intervals.

174 **(B)** Single-trials of the LFP signal, band-pass filtered at the 30-40 Hz gamma band. Gamma oscillations are  
175 composed of transient bursts during which oscillations increase in amplitude. Note how the bursts tend to occur in  
176 sync with left-right transitions of the stimulus and tend increase in amplitude as a function of total elapsed time.

177 **(C)** Gamma amplitude on each trial is coded by color (939 trials; 500 ms interval). Trials were sorted to  
178 burst onset time within the window marked by the black line at the bottom. The panel on the right shows the

179 gamma bursts aligned to their onset time. Bursts were defined as the period in which gamma amplitude exceeded  
180 the 90<sup>th</sup> percentile of the amplitude distribution across trials, for at least 100 ms (4 cycles of the gamma rhythm).  
181 **(D)** Mean gamma amplitude is plotted as a function of elapsed time. Note how the periodic increases in gamma  
182 are in sync with the left-right internal rhythm during the *maintenance* intervals. The panel on the right shows the  
183 mean profile of the bursts in the last *maintenance* interval. The inset shows the distribution of the gamma  
184 amplitude during bursting (red distribution) and non-bursting (blue distribution) periods of the trials (dark vertical  
185 lines indicate the median burst amplitude for each distribution).

186

187 This trend is readily visualized by color-coding the amplitude of gamma oscillations and  
188 plotting all recorded trials on a single panel (Figure 2C). It is readily apparent that gamma  
189 bursts during *maintenance* tend to appear around the times at which the stimulus should be  
190 switching from one side of the screen to the other. This pattern is captured by the mean  
191 gamma amplitude, across trials, as a function of elapsed time (Figure 2D;  $p < 0.01$ , t-test that  
192 compared amplitudes at the times of switch [0.5 and 1 s] versus amplitudes at the middle of  
193 the interval [0.75 and 1.25 s]; 125 ms windows).

194

195 These salient temporal features of the gamma LFP were consistent across the three interval  
196 durations (Figure 3A; 500, 750, and 1000 ms intervals). To better demonstrate the distribution  
197 of the gamma bursts, we sorted the trials according to burst onset time in each of the four  
198 *maintenance* intervals.

199

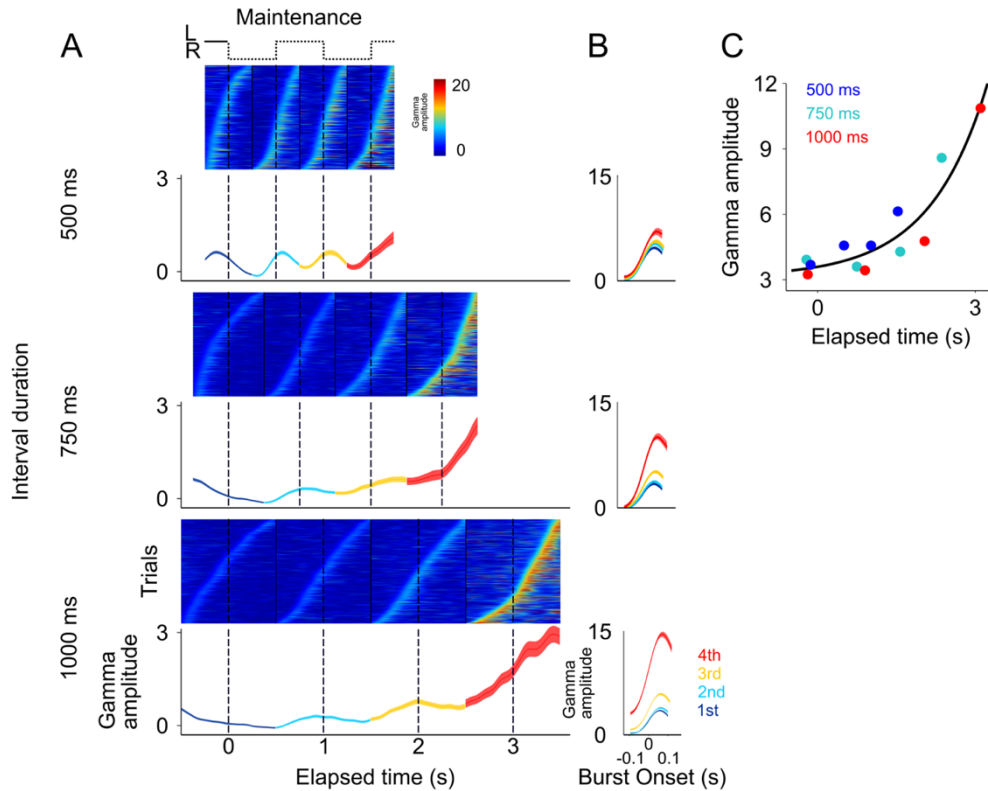

200

201 **Figure 3. Gamma bursts in *maintenance* intervals for the three tempos (500, 750, 1000 ms).**

202 **(A)** For each interval and tempo, the bursts are ordered according to their onset time. Below single trials, the  
203 mean gamma amplitude is plotted as a function of time.

204 **(B)** The temporal profile of gamma bursts is plotted for each stimulus transition (1<sup>st</sup>, 2<sup>nd</sup>, 3<sup>rd</sup>, and 4<sup>th</sup>), and for each  
205 interval duration (500, 750, and 1000 ms; top to bottom). The bursts have a stereotyped temporal shape and  
206 increase in amplitude after each consecutive transition.

207 **(C)** Mean amplitude of gamma bursts plotted as a function of elapsed time for the three interval durations (500,  
208 750, and 1000 ms).

209

210 It is important to emphasize that there are no motor actions during the *maintenance* intervals,  
211 and no periodic stimuli is shown on the screen. The only difference between the three groups  
212 of trials (500, 750, 1000 ms) is the tempo of the internal rhythm that subjects are maintaining.  
213 In other words, the rapid succession of the gamma bursts in the 500 ms intervals, and the

214 more temporally distant bursts in the 1000 ms intervals, are a reflection of the subject's internal  
215 maintenance of a visuo-spatial rhythm for the fast and slow tempos, respectively. This finding  
216 reveals a neural signature of rhythms, of different tempos, that are maintained internally.

217

218 Alignment of the gamma bursts to their onset time revealed that bursts have a similar temporal  
219 profile across tempos and elapsed intervals (Figure 3B). Importantly, we found that the  
220 amplitude of these bursts increased in proportion to the time elapsed since the initiation of the  
221 internal rhythm (Figure 3C,  $R^2=0.86$ ). The results presented so far indicate that (1) the LFPs in  
222 SMA encode internal rhythms by means of gamma bursts that occur in sync with the beats  
223 (i.e., location switch) of a visual metronome presented earlier; and that (2) these bursts  
224 increase in amplitude, providing a correlated for total elapsed time.

225

### 226 **Errors due to deviations of the internal rhythm from the objective tempo**

227 In a previous study we demonstrated that human subjects tend to lag behind fast tempos and  
228 get ahead of slow ones (García-Garibay et al. 2016). This predicts that animals might  
229 systematically overestimate the 500 ms rhythms, and underestimate the 1000 ms rhythms.  
230 However, since animals only had two response options (left or right), it was not possible to use  
231 behavioral responses to disambiguate errors in which the animals were ahead or behind the  
232 true tempo. Nonetheless, we hypothesized that systematic over and underestimations of the  
233 intervals should be reflected in the patters of gamma activity in SMA. We therefore compared  
234 the profile of gamma activity as a function of time, on correct and incorrect trials (Figure 4A).

235

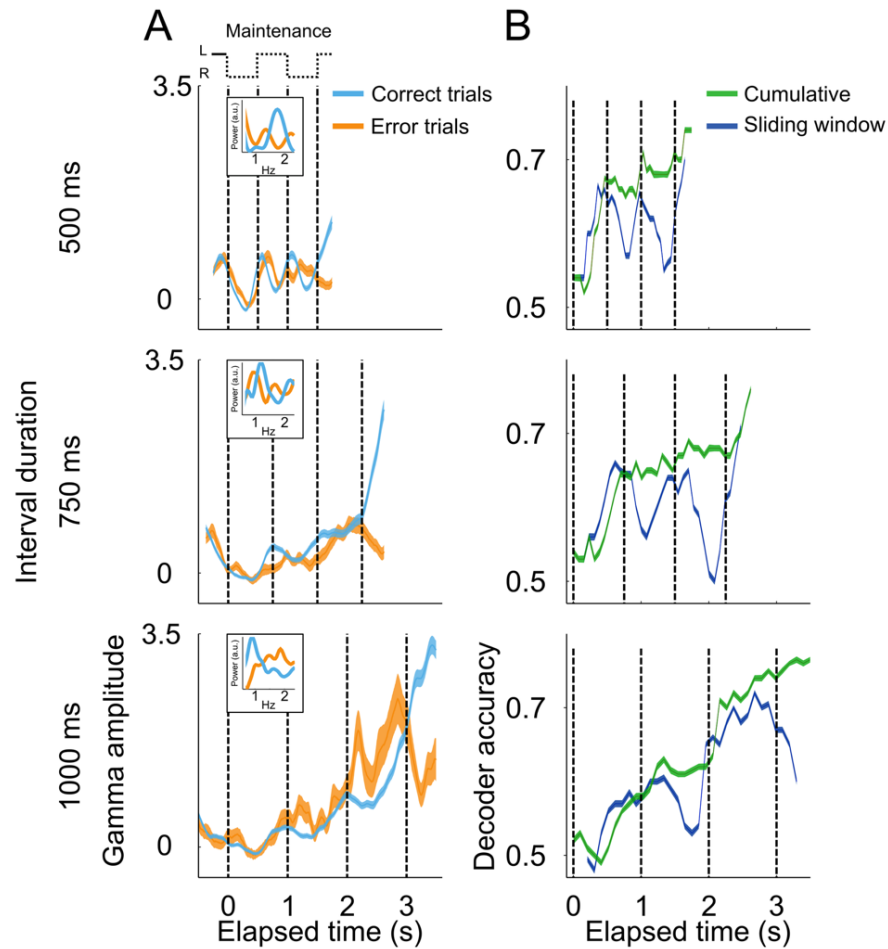

236

237 **Figure 4. Gamma amplitude in correct and error trials.**

238 **(A)** Mean gamma amplitude during *maintenance* intervals, for correct (blue) and error trials (orange) (n=1400-  
239 3000 correct, 260-540 errors; colored area denotes s.e.m. across trials). The insets on each panel show the  
240 periodogram (power spectral density) of correct and error trials (mean across single trials).

241 **(B)** Correct and error trials can be classified with increasing accuracy as a function of elapsed time. Two logistic  
242 classifiers were used to differentiate between correct and error trials (cross-validated on 50 correct and 50 error  
243 trials; n=100 iterations; line with shows s.e.m.). One used a growing window (cumulative, green line) that  
244 incorporated the gamma amplitude data as each trial developed, and the other used a sliding window of constant  
245 length across each trial (sliding window, blue line).

246

247 The results showed that, on the fast tempo trials (500 ms interval), the dynamics of gamma on  
248 error trials was right-shifted with respect to correct trials. That is, error trials displayed slower  
249 dynamics compared to correct trials (Figure 4A, upper panel). This trend was also captured by  
250 the power spectrums of error and correct trials, which showed that error trials indeed oscillated  
251 at lower frequencies (Figure 4A, inset on upper panel). Conversely, the dynamics of error trials  
252 on the slow tempo (1000 ms) resemble a left-shifted version of the correct trials, i.e., errors  
253 displayed faster dynamics as compared to the correct trials (Figure 4A; bottom panel). This  
254 pattern is also demonstrated by the power spectrums of correct and error trials, which show  
255 that error trials oscillated at higher frequencies compared to correct trials (Figure 4A, inset on  
256 the bottom panel). These results suggest that monkeys were lagging behind fast tempos and  
257 getting ahead of slow ones.

258

259 That the subject's internal rhythm increasingly fell out of synchrony with the true tempo during  
260 error trials was also demonstrated by the ability of a logistic classifier (see Methods) to  
261 differentiate between correct and error trials, as a function of elapsed time (Figure 4B). This  
262 analysis shows that error trials are increasingly easier to decode as a function of elapsed time,  
263 just as it is expected from a rhythm that increasingly falls out of sync with the correct tempo.  
264 This pattern holds true for a classifier that cumulatively uses gamma amplitude information as  
265 the trial develops, and also for a classifier using the information from a sliding window as of  
266 constant length across the trial (Figure 4B).

267

268 **Gamma band activity in a *delayed-reach* task**

269 Since SMA participates in the preparation of impending motor actions, it is possible that the  
270 rhythmic gamma bursts that we observed arise because this premotor area rhythmically  
271 prepare reach movements alternatively to the left and right locations of the screen. To test this  
272 possibility, we recorded the LFPs in a *delayed-reach* control task (Hwang and Andersen 2011)  
273 in which subjects were required to reach to the left or the right after being cued by a briefly  
274 presented visual stimulus (Figure 5A). In this task, monkeys waited a pseudo-randomly chosen  
275 time (1100 to 3000 ms, exponential distribution) before reaching towards the location specified  
276 by the cue (Figure 5B).

277

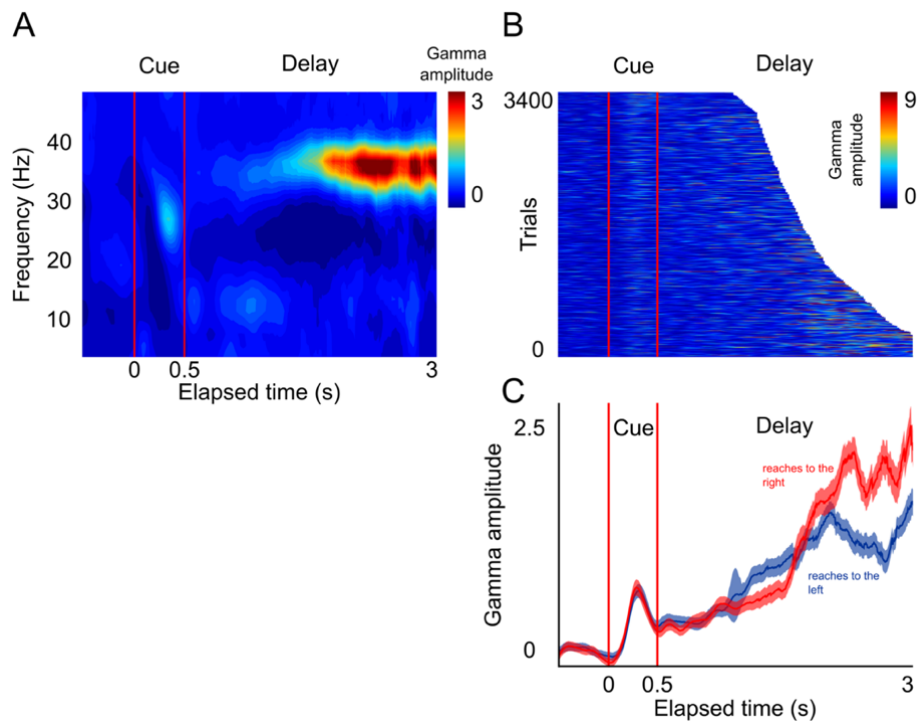

278

279 **Figure 5. LFP activity in a *delayed-reach* task.**

280 (A) Mean spectrogram of the LFPs during the *delayed-reach* task (reaches to the right side of the screen are  
281 shown). The stimulus presentation is indicated by the red lines a 0-0.5 s (*cue*). After the sensory cue, a variable



282 delay between followed (1.2-3 s; exponential distribution). A salient activation of the gamma band during the delay  
283 period can be observed.

284 **(B)** Gamma amplitude across single trials of the delayed-reach task.

285 **(C)** Mean gamma amplitude plotted as a function of elapsed time. After a brief sensory response, gamma activity  
286 increases as a function of elapsed time. Red and blue lines indicate reaches to the right and to the left,  
287 respectively.

288

289 The results of this control task show that, as monkeys prepare an impending reach movement,  
290 the LFPs in SMA generate bursts of gamma band activity that occur more frequently, and with  
291 increasing amplitude, as a function of total elapsed time (Figure 5C, *delay* period). These  
292 findings are consistent with the idea that gamma bursts in SMA encode impending motor  
293 commands. Moreover, the results of this control task are consistent with the idea that the SMA  
294 circuits reflect internal rhythms by means of rhythmically alternating motor plans to make a  
295 reach movement to the left and right locations of the screen.

296

### 297 **Gamma oscillations during entrainment of the visual metronome**

298 According to the previous *delayed-reach* experiment, gamma bursts might be reflecting an  
299 internal rhythm by periodically alternating “*reach-left*” and “*reach-right*” motor plans. However,  
300 our task is designed such that a motor response was never required during the three  
301 *entrainment* intervals. For this reason, we next analyzed the gamma band activity during the  
302 *entrainment* intervals in which the presentation of the alternating visuo-spatial stimuli defined  
303 the different tempos of the visual metronome task (500, 750, and 1000 ms intervals; Figure 6A-  
304 B).

305

306 The results showed that even during *entrainment* intervals, which did not involve any motor  
307 planning, bursts of gamma oscillations were present in each interval, and their amplitude  
308 progressively increased after the presentation of each visual stimulus (Figure 6A-C). It is  
309 important to note that gamma activity in *entrainment* intervals peaked after each stimulus  
310 presentation. This is in contrast to what was observed during *maintenance* intervals, in which  
311 the peaks of gamma occurred when the stimulus switched sides. We speculate that this phase  
312 offset could be related to the process of estimating interval duration, a process that necessarily  
313 happens during *entrainment* intervals.

314

315 A potential concern is that the gamma bursts in *entrainment* intervals are merely sensory  
316 responses to visual stimuli. However, a pure sensory response should produce similar gamma  
317 dynamics after each stimulus presentation, both across consecutive entrainment intervals (1<sup>st</sup>,  
318 2<sup>nd</sup>, 3<sup>rd</sup>), and also similar across tempos (500, 750, 1000 ms), which was clearly not the case in  
319 our results (Figure 6A). In particular, two observations suggest that gamma bursts during  
320 entrainment cannot be explained solely in terms of a sensory response. First, gamma bursts  
321 increased in amplitude as a function of elapsed time, but the amplitude dropped sharply 500  
322 ms after the onset of the third *entrainment* interval (Figure 6A, 750 and 1000 ms panels).

323 Therefore, gamma bursts carry information about the animals' knowledge that the third  
324 *entrainment* interval was the last visible interval, i.e. the last interval that could be used for  
325 estimating the tempo. Thus, gamma dynamics likely incorporate aspects of higher cognitive  
326 processing. Second, the times of burst onset do not have a fixed temporal profile with respect  
327 to stimulus presentation (Figure 6B). To demonstrate this, we measured the distribution of  
328 burst onset time across each consecutive interval (1<sup>st</sup>, 2<sup>nd</sup>, and 3<sup>rd</sup> *entrainment* intervals) and

329 across metronome tempos (500, 750, and 1000 ms), and then performed Chi-squared tests  
330 between these distributions (by using burst onset time we removed the effect of burst  
331 amplitude). The tests demonstrated that the temporal profiles of gamma onset times  
332 significantly differ, both across consecutive intervals and across metronome tempos ( $p < 0.01$ ;  
333 corrected for multiple comparisons). In fact, gamma responses to stimulus onset are similar  
334 only during first 500 ms of the first *entrainment* interval, which is the only epoch in which  
335 monkeys have no information about the metronome tempo (Figure 6C). These results indicate  
336 that gamma bursts reflect cognitive processes related to estimating the rhythm of the visual  
337 metronome.  
338

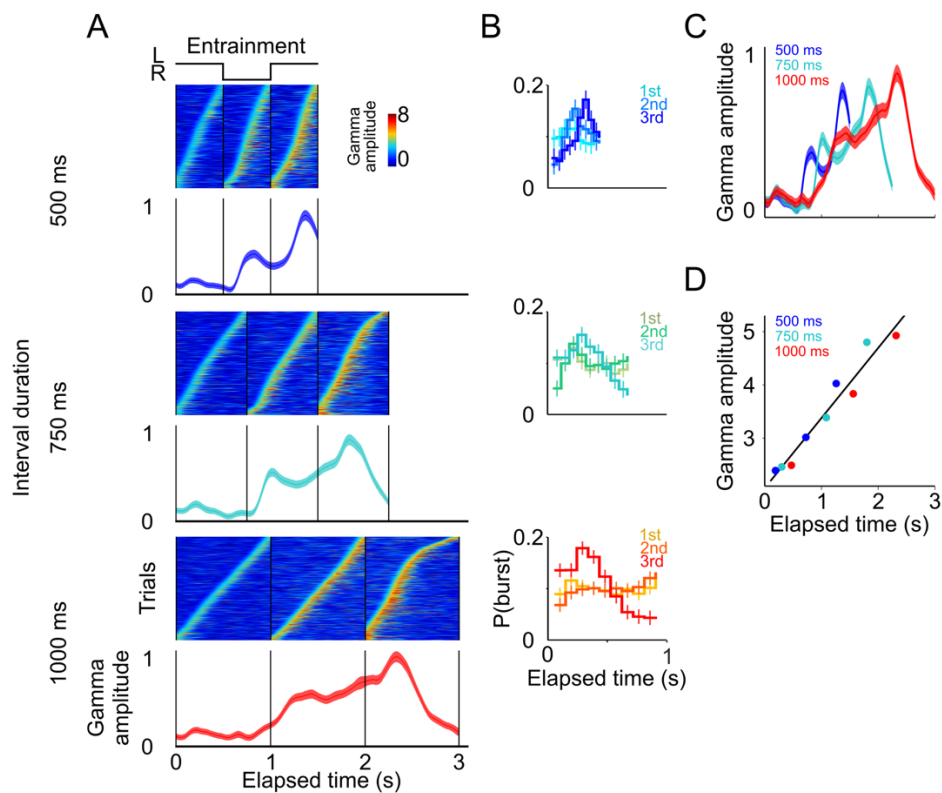

339  
340 **Figure 6. Gamma band activity in *entrainment* intervals.**

341 **(A)** Gamma bursts in single trials sorted by their onset time for each *entrainment* interval, and for each tempo  
342 (500, 750, and 1000 ms). Below the single trial panels, the mean gamma amplitude is plotted as a function of  
343 time.  
344 **(B)** Probability of burst onset plotted a function of elapsed time. Line color on each panel indicates the distribution  
345 of onset times for the consecutive *entrainment* intervals (1<sup>st</sup>, 2<sup>nd</sup>, and 3<sup>rd</sup>).  
346 **(C)** Mean gamma dynamics for the three tempos, plotted on the same timescale (same curves as the ones below  
347 single trial panels in (A)). Note how mean gamma amplitude increases with each *entrainment* interval.  
348 **(D)** Burst amplitude as a function of elapsed time in *entrainment* intervals, for the three tempos.

349

350 To quantify the extent to which gamma burst amplitude encodes total elapsed time, we  
351 measured burst amplitudes in each of the three *entrainment* intervals (Figure 6D). We found  
352 that burst amplitude increased linearly in proportion to total elapsed time ( $R^2=0.94$ ). In this  
353 manner, in addition to periodically generating bursts in each *entrainment* interval, the SMA  
354 circuit reflected the total elapsed time since the beginning of the *entrainment* epoch.

355

### 356 **Neuronal spikes are associated with gamma band activity**

357 Simultaneously with LFPs, we recorded the extracellular spike potentials of 113 neurons in the  
358 SMA (78 monkey 1; 35 monkey 2). The analysis of single unit activity will be the subject of a  
359 future report, but here we show five example units to illustrate the diversity of firing rate  
360 patterns in SMA during the visual metronome task (Figure 7).

361

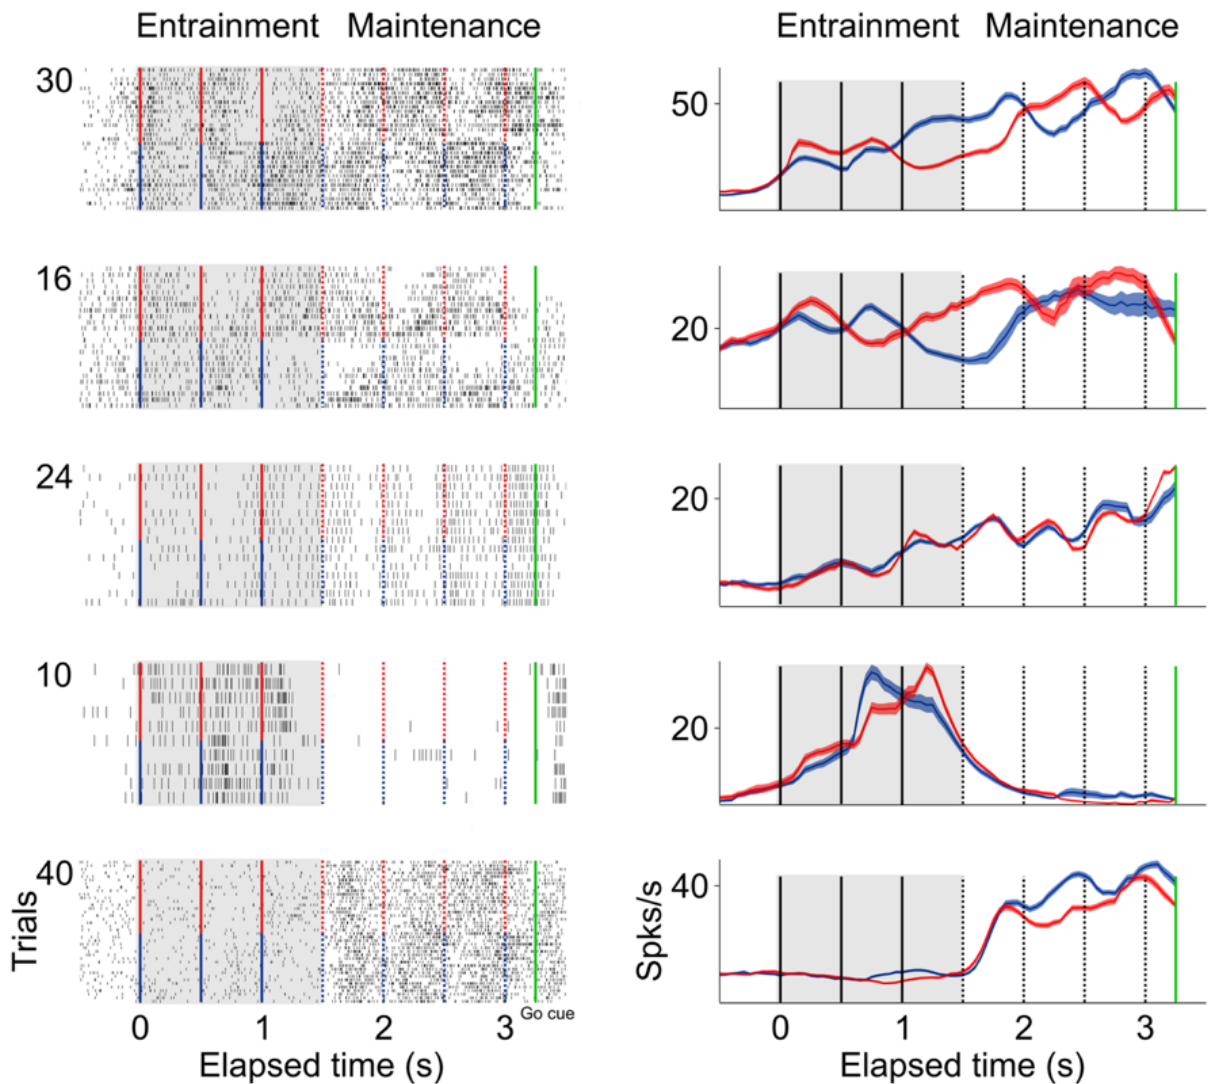

362

363 **Figure 7. Firing patterns of single neurons during the visual metronome task.**

364 The panels on the left column show the raster plots of five example neurons during *entrainment* and *maintenance*

365 intervals of the task. Green lines indicate the *go-cue* at the last *maintenance* interval. Red markers indicate

366 intervals in trials where the stimulus initiated on the right, and blue markers when the stimulus initiated on the left.

367 Panels on the right show the mean firing rate of each neuron. Firing patterns in SMA are diverse. The first two

368 neurons (top to bottom) have preference for one side of the screen. The third neuron oscillates in sync with the

369 stimulus tempo but shows no side preference. The fourth neuron is mostly active during the last two *entrainment*

370 intervals. The fifth neuron is mostly active during the *maintenance* intervals.

371

372 To explore the relationship between single-neuron spiking and the simultaneously recorded  
373 LFP, we calculated the spike-triggered average (STA) LFP, and its spectral density, within a  
374 window of -100 to 100 ms surrounding each spike (Figure 8A-B, see Methods) (Denker et al.  
375 2011; P. Fries 2001). We found that the LFP activity simultaneously recorded with each spike  
376 has a power peak at 30 Hz, and this peak is especially salient during *maintenance* intervals  
377 (Figure 8A, bottom panel; factorial ANOVA: interaction band/condition  $F=12.11$   $p<.05$ ,  
378 Bonferroni tests of Gamma power in *maintenance* and *entrainment* vs baseline:  $p<.05$ ).  
379 Moreover, the association between spikes and the 25-40 Hz frequency band is stronger at the  
380 times of stimulus transitions, i.e. around the times at which the stimulus switches from one side  
381 of the screen to the other (Figure 8C; window length around switch: half an interval, t test  
382  $p<.005$ ). To demonstrate that gamma is closely associated with the timing of spikes we  
383 performed a control analysis in which we jittered the spike times by  $\pm 15$  ms with the resulting  
384 loss of the observed peak at the gamma band (random uniform distribution; grey traces Figure  
385 8c; t test between jittered data in switch and non-switch conditions  $p=0.21$ ).

386

387 These analyses demonstrate that the performance of the metronome task is accompanied by a  
388 tighter temporal relationship between the gamma bursts and the firing of single neurons, and  
389 this association is more prominent at the times of stimulus switching during the *maintenance*  
390 intervals. These results are consistent with previous investigations proposing that LFP  
391 oscillations near the gamma frequencies could help single neurons synchronize their firing,  
392 and thus have a larger and more temporally precise influence on downstream target structures  
393 (Siegle, Pritchett, and Moore 2014; Veit et al. 2017; Pascal Fries 2015).

394

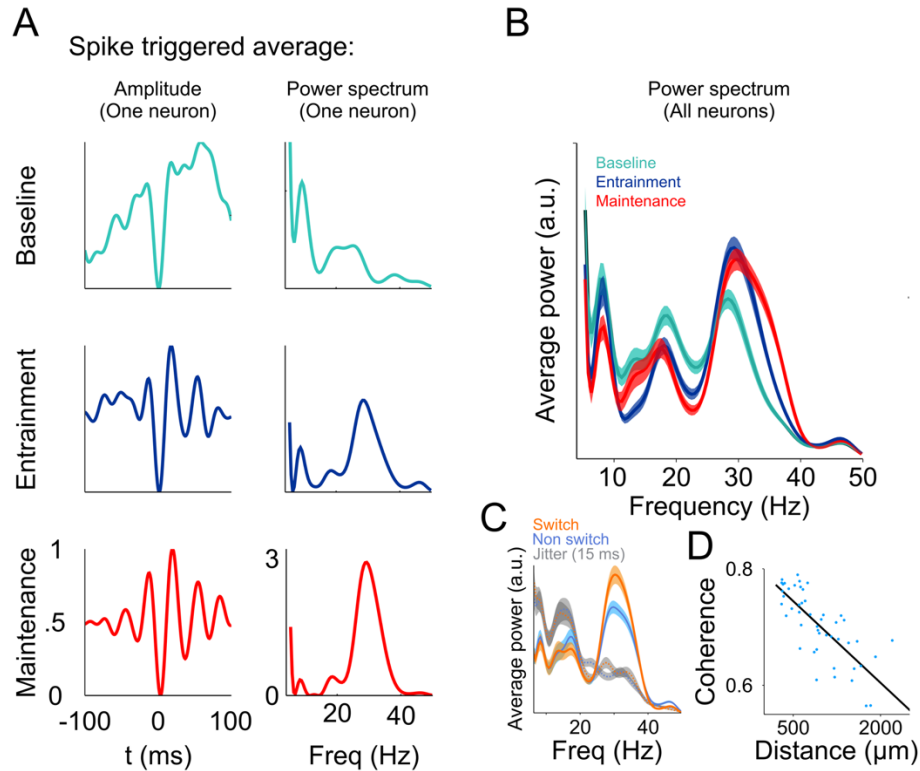

395

396 **Figure 8. Relationship between spikes and LFP during the visual metronome task.**

397 **(A)** The three panels on the left show the spike-triggered average (STA) of the LFP signal surrounding each  
398 individual spike of an example neuron (-100 to 100 ms window centered at each spike time). The STA of three  
399 epochs is shown; *baseline* (cyan), *entrainment* (blue), and *maintenance* (red). The three panels on the left show  
400 the power spectrum of the STA on each epoch.

401 **(B)** Average STA power across neurons. Colors denote trial epochs. Note the salient power of the STA around 30  
402 Hz (colored areas show s.e.m. across neurons; n=113).

403 **(C)** Average STA power for periods of stimulus switch and non-switch (windows of half the interval length,  
404 centered at times of switch or at the middle of each interval; colored areas show s.e.m. across neurons). Dotted  
405 lines and gray areas show the STA power obtained by jittering the spikes  $\pm 15$  ms.

406 **(D)** Coherence between the LFPs in simultaneously recorded electrodes, as a function of distance between them.  
407 The negative slope suggests that the recorded LFPs are generated by neuronal circuits in the vicinity of the  
408 recording electrodes.

409

410 Finally, we demonstrate that the LFP signals we recorded reflect local interaction and were not  
411 the result of signals being volume-conducted from other brain regions. We measured the  
412 coherence between LFPs of simultaneously recorded electrodes and plotted this measure as a  
413 function of the distance between them. The results show that coherence decayed as a function  
414 of electrode distance (Figure 8D,  $R^2=0.72$ ), as expected by an LFP signal that is generated in  
415 the neuronal circuits within the vicinity of the recording electrode.

416

## 417 **Discussion**

418 Our results show that (1) monkeys can maintain rhythms in the absence of sensory stimuli and  
419 in the absence of overt motor commands. (2) Those internal rhythms are encoded by bursts of  
420 low gamma-band LFP oscillations in SMA whose timing and amplitude indicate rhythm  
421 intervals and total elapsed time, respectively. (3) The spikes of single neurons are associated  
422 with the low gamma band frequency of the LFP, which is consistent with the idea that gamma  
423 oscillations might help to synchronize populations of neurons whose temporally coincident  
424 firing would have a larger impact on its postsynaptic targets (Buzsáki 2015; Cardin et al. 2009;  
425 Pascal Fries 2015; Siegle, Pritchett, and Moore 2014; Veit et al. 2017; Womelsdorf et al. 2007;  
426 Wong et al. 2016).

427

428 The results of the *delayed-reach* task suggest that the bursts of gamma activity signal the  
429 preparation and impending execution of a motor plan (Merchant and Averbach 2017; Mita et al.  
430 2009; Chen, Scangos, and Stuphorn 2010; Ohara et al. 2001; Yokoyama, Nakayama, and  
431 Hoshi 2016; Shima and Tanji 2000). However, a purely motor explanation of our findings is not  
432 granted. First, gamma activity not only signals left-right transitions, but also total elapsed time.



433 Second, bursts of gamma activity are also observed during the *entrainment* phase of the  
434 metronome task, a phase in which no motor actions are required. Instead, we favor the  
435 hypothesis that LFP signals in the premotor cortex are neither sensory nor motor, but encode a  
436 latent variable associated with a mental rhythm.

437

438 It has been debated whether subjects performing a rhythmic task time individual intervals, or  
439 instead rely on an estimate of total elapsed time (Laje, Cheng, and Buonomano 2011). Our  
440 results revealed that rhythms of different tempos are based on a neuronal representation of  
441 individual intervals, and there is also information available in the system about total elapsed  
442 time.

443

444 It is thought that gamma synchronization might be useful to the formation of local ensembles of  
445 neurons that increase the temporal coordination of presynaptic spikes on postsynaptic targets,  
446 allowing brief windows of effective communication (Wong et al. 2016; Womelsdorf et al. 2007;  
447 Buzsáki 2015). Previous results show that gamma oscillations increase before the execution of  
448 a motor action, and then shut down at the time of movement onset (Yokoyama, Nakayama,  
449 and Hoshi 2016) a result replicated by our data.

450

451 Previous work by Merchant and colleagues found that LFP gamma band activity in the basal  
452 ganglia was associated with the presentation of sensory stimuli defining the intervals within a  
453 hand tapping task (Bartolo, Prado, and Merchant 2014). They found that bursts of gamma  
454 were selective for intervals of different durations, and thus different cell populations were

455 selective for different time intervals. We found no such duration selectivity in the SMA cortex,  
456 instead observing that gamma bursts encoded intervals of different durations.

457

458 Signals associated with timing tasks can be found across multiple brain areas, including  
459 parietal, motor, and premotor cortices, as well as dopaminergic midbrain neuron in the primate  
460 (Ghose and Maunsell 2002; Genovesio et al. 2006; Wise 2000; Mita et al. 2009; Harrington et  
461 al. 2010). For example, Jazayeri and Shadlen (2015) have shown that activity of single  
462 neurons in the lateral intraparietal area encodes the time elapsed time from a previous sensory  
463 stimuli, as well as the time remaining to initiate a saccadic eye movement (Jazayeri and  
464 Shadlen 2015). Importantly, they showed that these signals calibrate themselves according to  
465 the underlying probability to make an eye movement within a given temporal window. A recent  
466 important result by Jazayeri and colleagues demonstrated that encoding intervals of different  
467 lengths is achieved by means of speeding up or slowing down the temporal dynamics of  
468 populations of neurons that, individually, display widely different firing patterns (Wang et al.  
469 2017). Our results extend this finding to the dynamics of the LFP oscillations by demonstrating  
470 that they also show temporal scaling (Figures 3A and 6C). A coherent picture is thus emerging,  
471 indicating that time-estimation and time-production signals are present as dynamic motor plans  
472 that are distributed across the motor structures that participate in executing timely motor  
473 actions.

474 **Acknowledgments**

475 We thank Edgar Bolaños for technical assistance and Juan Ortiz for obtaining the MRI images.  
476 This work was supported by grants to from CONACYT Ciencia básica 254313 (VdL), 236836  
477 (HM); Fronteras de la Ciencia 245 (VdL), 196 (HM); and PAPIIT IN207818 (VdL), IN202317  
478 (HM). JCV is a doctoral student from Programa de Doctorado en Ciencias Biomédicas,  
479 Universidad Nacional Autónoma de México (UNAM) and received fellowship number 486768  
480 from Consejo Nacional de Ciencia y Tecnología (CONACYT).

481

482 **Author contributions**

483 JCV, OGG and VdL performed the experiments. VdL and MJ conceptualized the behavioral  
484 task. JCV performed the data analysis and generated the figures. All authors contributed to the  
485 interpretation of data. JCV and VdL wrote the first draft of the manuscript and all authors  
486 contributed to its final version.

487

488 **Declaration of interests**

489 The authors declare no competing interests.

490 **References**

- 491 Bartolo, Ramón, Luis Prado, and Hugo Merchant. 2014. "Information Processing in the Primate  
492 Basal Ganglia during Sensory-Guided and Internally Driven Rhythmic Tapping." *The  
493 Journal of Neuroscience : The Official Journal of the Society for Neuroscience* 34 (11):  
494 3910–23. doi:10.1523/JNEUROSCI.2679-13.2014.
- 495 Buhusi, Catalin V, and Warren H Meck. 2005. "What Makes Us Tick? Functional and Neural  
496 Mechanisms of Interval Timing." *Nature Reviews. Neuroscience* 6: 755–65.  
497 doi:10.1038/nrn1764.
- 498 Buzsáki, György. 2015. "What Does Gamma Coherence Tell Us about Inter-Regional Neural  
499 Communication?" *Nature Neuroscience* 18 (4). Nature Publishing Group: 1–6.  
500 doi:10.1038/nn.3952.
- 501 Buzsáki, György, Costas a. Anastassiou, and Christof Koch. 2012. "The Origin of Extracellular  
502 Fields and Currents — EEG, ECoG, LFP and Spikes." *Nature Reviews Neuroscience* 13  
503 (6). Nature Publishing Group: 407–20. doi:10.1038/nrn3241.
- 504 Cardin, Jessica a, Marie Carlén, Konstantinos Meletis, Ulf Knoblich, Feng Zhang, Karl  
505 Deisseroth, Li-Huei Tsai, and Christopher I Moore. 2009. "Driving Fast-Spiking Cells  
506 Induces Gamma Rhythm and Controls Sensory Responses." *Nature* 459 (June): 663–67.  
507 doi:10.1038/nature08002.
- 508 Chen, Xiaomo, Katherine Wilson Scangos, and Veit Stuphorn. 2010. "Supplementary Motor  
509 Area Exerts Proactive and Reactive Control of Arm Movements." *The Journal of  
510 Neuroscience : The Official Journal of the Society for Neuroscience* 30 (44): 14657–75.  
511 doi:10.1523/JNEUROSCI.2669-10.2010.
- 512 Cohen, Michael X. 2014. *Analyzing Neural Time Series Data*. The MIT Press.

- 513 Confais, J., B. E. Kilavik, A. Ponce-Alvarez, and A. Riehle. 2012. “On the Anticipatory Precue  
514 Activity in Motor Cortex.” *Journal of Neuroscience* 32 (44): 15359–68.  
515 doi:10.1523/JNEUROSCI.1768-12.2012.
- 516 Crowe, D. a., W. Zarco, R. Bartolo, and H. Merchant. 2014. “Dynamic Representation of the  
517 Temporal and Sequential Structure of Rhythmic Movements in the Primate Medial  
518 Premotor Cortex.” *Journal of Neuroscience* 34 (36): 11972--11983.  
519 doi:10.1523/JNEUROSCI.2177-14.2014.
- 520 de Lafuente, Victor, Mehrdad Jazayeri, and Michael N Shadlen. 2015. “Representation of  
521 Accumulating Evidence for a Decision in Two Parietal Areas.” *The Journal of  
522 Neuroscience : The Official Journal of the Society for Neuroscience* 35 (10): 4306–18.  
523 doi:10.1523/JNEUROSCI.2451-14.2015.
- 524 Denker, Michael, Sébastien Roux, Henrik Lindén, Markus Diesmann, Alexa Riehle, and Sonja  
525 Grün. 2011. “The Local Field Potential Reflects Surplus Spike Synchrony.” *Cerebral  
526 Cortex* 21 (12): 2681–95. doi:10.1093/cercor/bhr040.
- 527 Fries, P. 2001. “Modulation of Oscillatory Neuronal Synchronization by Selective Visual  
528 Attention.” *Science* 291 (5508): 1560–63. doi:10.1126/science.1055465.
- 529 Fries, Pascal. 2015. “Rhythms for Cognition: Communication through Coherence.” *Neuron* 88  
530 (1). Elsevier Inc.: 220–35. doi:10.1016/j.neuron.2015.09.034.
- 531 García-Garibay, Otto, Jaime Cadena-Valencia, Hugo Merchant, and Victor de Lafuente. 2016.  
532 “Monkeys Share the Human Ability to Internally Maintain a Temporal Rhythm.” *Frontiers in  
533 Psychology* 7 (December): 1–12. doi:10.3389/fpsyg.2016.01971.
- 534 Genovesio, Aldo, Satoshi Tsujimoto, Steven P Wise, and Steven P Wise Neu-. 2006.  
535 “Neuronal Activity Related to Elapsed Time in Prefrontal Cortex Neuronal Activity Related

- 536 to Elapsed Time in Prefrontal Cortex.” *Journal of Neurophysiology* 132: 3281–85.  
537 doi:10.1152/jn.01011.2005.
- 538 Ghose, Geoffrey M, and John H R Maunsell. 2002. “Attentional Modulation in Visual Cortex  
539 Depends on Task Timing.” *Nature* 419 (October): 616–20. doi:10.1038/nature01057.
- 540 Gibbon, John, Chara Malapani, Corby L. Dale, and C. R. Gallistel. 1997. “Toward a  
541 Neurobiology of Temporal Cognition: Advances and Challenges.” *Current Opinion in*  
542 *Neurobiology* 7 (2): 170–84. doi:10.1016/S0959-4388(97)80005-0.
- 543 Goel, A, and D V Buonomano. 2014. “Timing as an Intrinsic Property of Neural Networks:  
544 Evidence from in Vivo and in Vitro Experiments.” *Philosophical Transactions of the Royal*  
545 *Society of London. Series B, Biological Sciences* 369 (1637): 20120460.  
546 doi:10.1098/rstb.2012.0460.
- 547 Grahn, Jessica A., and Matthew Brett. 2007. “Rhythm and Beat Perception in Motor Areas of  
548 the Brain.” *Journal of Cognitive Neuroscience* 19 (5): 893–906.  
549 doi:10.1162/jocn.2007.19.5.893.
- 550 Grondin, Simon. 2001. “From Physical Time to the First and Second Moments of Psychological  
551 Time.” *Psychological Bulletin* 127 (1): 22–44. doi:10.1037/0033-2909.127.1.22.
- 552 Harrington, Deborah L., Janice L. Zimelman, Sean C. Hinton, and Stephen M. Rao. 2010.  
553 “Neural Modulation of Temporal Encoding, Maintenance, and Decision Processes.”  
554 *Cerebral Cortex* 20 (June): 1274–85. doi:10.1093/cercor/bhp194.
- 555 Hwang, Eun Jung, and Richard a Andersen. 2011. “Effects of Visual Stimulation on LFPs,  
556 Spikes, and LFP-Spike Relations in PRR.” *Journal of Neurophysiology* 105 (4): 1850–60.  
557 doi:10.1152/jn.00802.2010.
- 558 Ivry, R. 2004. “The Neural Representation of Time.” *Current Opinion in Neurobiology* 14: 225–

- 559 32. doi:10.1016/j.conb.2004.03.013.
- 560 Jazayeri, Mehrdad, and Michael N. Shadlen. 2015. "A Neural Mechanism for Sensing and  
561 Reproducing a Time Interval." *Current Biology* 25 (20). Elsevier Ltd: 2599–2609.  
562 doi:10.1016/j.cub.2015.08.038.
- 563 Jazayeri, Mehrdad, and Michael N Shadlen. 2010. "Temporal Context Calibrates Interval  
564 Timing." *Nature Neuroscience* 13 (8). Nature Publishing Group: 1020–26.  
565 doi:10.1038/nn.2590.
- 566 Laje, Rodrigo, Karen Cheng, and Dean V. Buonomano. 2011. "Learning of Temporal Motor  
567 Patterns: An Analysis of Continuous Versus Reset Timing." *Frontiers in Integrative  
568 Neuroscience* 5 (October): 1–11. doi:10.3389/fnint.2011.00061.
- 569 Leon, Mi, and Mn Shadlen. 2003. "Representation of Time by Neurons in the Posterior Parietal  
570 Cortex of the Macaque." *Neuron* 38 (2): 317–27.
- 571 Levitin, Daniel J., Jessica A. Grahn, and Justin London. 2018. "The Psychology of Music:  
572 Rhythm and Movement." *Annual Review of Psychology* 69 (1): 51–75.  
573 doi:10.1146/annurev-psych-122216-011740.
- 574 Lundqvist, Mikael, Jonas Rose, Pawel Herman, Scott L. Brincat, Timothy J. Buschman, and  
575 Earl K. Miller. 2016. "Gamma and Beta Bursts Underlie Working Memory." *Neuron*.  
576 Elsevier Inc., 1–13. doi:10.1016/j.neuron.2016.02.028.
- 577 Merchant, Hugo, and Bruno B. Averbeck. 2017. *The Computational and Neural Basis of  
578 Rhythmic Timing in Medial Premotor Cortex. The Journal of Neuroscience*. Vol. 37.  
579 doi:10.1523/JNEUROSCI.0367-17.2017.
- 580 Merchant, Hugo, Oswaldo Pérez, Wilbert Zarco, and Jorge Gámez. 2013. "Interval Tuning in  
581 the Primate Medial Premotor Cortex as a General Timing Mechanism." *The Journal of*

- 582 *Neuroscience* 33 (21): 9082–96. doi:10.1523/JNEUROSCI.5513-12.2013.
- 583 Mita, Akihisa, Hajime Mushiake, Keisetsu Shima, Yoshiya Matsuzaka, and Jun Tanji. 2009.
- 584 “Interval Time Coding by Neurons in the Presupplementary and Supplementary Motor
- 585 Areas.” *Nature Neuroscience* 12 (4): 502–7. doi:10.1038/nn.2272.
- 586 Mitra, P.P., and B. Pesaran. 1999. “Analysis of Dynamic Brain Imaging Data.” *Biophysical*
- 587 *Journal* 76 (2). Elsevier: 691–708. doi:10.1016/S0006-3495(99)77236-X.
- 588 Mitra, Partha P, and Hermant Bokil. 2007. *Observed Brain Dynamics*.
- 589 Murray, John D., Alberto Bernacchia, David J. Freedman, Ranulfo Romo, Jonathan D. Wallis,
- 590 Xinying Cai, Camillo Padoa-Schioppa, et al. 2014. “A Hierarchy of Intrinsic Timescales
- 591 across Primate Cortex.” *Nature Neuroscience* 17 (12). Nature Publishing Group: 1661–63.
- 592 doi:10.1038/nn.3862.
- 593 Ohara, S, T Mima, K Baba, a Ikeda, T Kunieda, R Matsumoto, J Yamamoto, et al. 2001.
- 594 “Increased Synchronization of Cortical Oscillatory Activities between Human
- 595 Supplementary Motor and Primary Sensorimotor Areas during Voluntary Movements.” *The*
- 596 *Journal of Neuroscience : The Official Journal of the Society for Neuroscience* 21 (23):
- 597 9377–86. doi:21/23/9377 [pii].
- 598 Pesaran, Bijan, John S Pezaris, Maneesh Sahani, Partha P Mitra, and Richard a Andersen.
- 599 2002. “Temporal Structure in Neuronal Activity during Working Memory in Macaque
- 600 Parietal Cortex.” *Nature Neuroscience* 5 (8): 805–11. doi:10.1038/nn890.
- 601 Shima, Keisetsu, and Jun Tanji. 2000. “Neuronal Activity in the Supplementary and
- 602 Presupplementary Motor Areas for Temporal Organization of Multiple Movements.”
- 603 *Journal of Neurophysiology* 84 (4): 2148–60. doi:80:3247-3260.
- 604 Siegle, Joshua H, Dominique L Pritchett, and Christopher I Moore. 2014. “Gamma-Range



- 605 Synchronization of Fast-Spiking Interneurons Can Enhance Detection of Tactile Stimuli.”  
606 *Nature Neuroscience* 17 (10). Nature Publishing Group: 1371–79. doi:10.1038/nn.3797.
- 607 Takeya, Ryuji, Masashi Kameda, Aniruddh D. Patel, and Masaki Tanaka. 2017. “Predictive  
608 and Tempo-Flexible Synchronization to a Visual Metronome in Monkeys.” *Scientific  
609 Reports* 7 (1). Springer US: 6127. doi:10.1038/s41598-017-06417-3.
- 610 Uematsu, Akiko, Shogo Ohmae, and Masaki Tanaka. 2017. “Facilitation of Temporal  
611 Prediction by Electrical Stimulation to the Primate Cerebellar Nuclei.” *Neuroscience* 346.  
612 IBRO: 190–96. doi:10.1016/j.neuroscience.2017.01.023.
- 613 Veit, Julia, Richard Hakim, Monika P Jadi, Terrence J Sejnowski, and Hillel Adesnik. 2017.  
614 “Cortical Gamma Band Synchronization through Somatostatin Interneurons.” *Nature  
615 Neuroscience*, no. April. doi:10.1038/nn.4562.
- 616 Wang, Jing, Devika Narain, Eghbal A. Hosseini, and Mehrdad Jazayeri. 2017. “Flexible Timing  
617 by Temporal Scaling of Cortical Responses.” *Nature Neuroscience*. Springer US.  
618 doi:10.1038/s41593-017-0028-6.
- 619 Wise, M A Lebedev S P. 2000. “Oscillations in the Premotor Cortex: Single-Unit Activity from  
620 Awake, Behaving Monkeys.” *Experimental Brain Research* 130: 195–215.
- 621 Womelsdorf, T., J.-M. Schoffelen, R. Oostenveld, W. Singer, R. Desimone, A. K. Engel, and P.  
622 Fries. 2007. “Modulation of Neuronal Interactions Through Neuronal Synchronization.”  
623 *Science* 316 (5831): 1609–12. doi:10.1126/science.1139597.
- 624 Wong, Yan T, Margaret M Fabiszak, Yevgeny Novikov, Nathaniel D Daw, and Bijan Pesaran.  
625 2016. “Coherent Neuronal Ensembles Are Rapidly Recruited When Making a Look-Reach  
626 Decision.” *Nature Neuroscience* 19 (2): 327–34. doi:10.1038/nn.4210.
- 627 Yokoyama, Osamu, Yoshihisa Nakayama, and Eiji Hoshi. 2016. “Area- and Band-Specific

628        Representations of Hand Movements by Local Field Potentials in Caudal Cingulate Motor  
629        Area and Supplementary Motor Area of Monkeys.” *Journal of Neurophysiology* 115: 1556–  
630        76. doi:10.1152/jn.00882.2015.

631

## 632 **Materials and Methods**

633 *Subjects.* Two adult male Rhesus monkeys (*Macaca mulatta*) participated in the study (weight:  
634 5-7 kg, age: 5, 7 years). Experimental procedures were approved by the Ethics in Research  
635 Committee of the Institute of Neurobiology and were in agreement with the principles outlined  
636 in the Guide for Care and Use of Laboratory Animals (National Institutes of Health). Each  
637 monkey was surgically implanted with titanium head bolts and a titanium recording chamber  
638 over the left supplementary motor area (SMA). Placement of the chambers over the SMA was  
639 guided by structural MRI for both monkeys (Figure 1E).

640

641 *Behavioral Task.* Monkeys were trained in a visual metronome task described in detail in a  
642 previous report (García-Garibay et al. 2016). Briefly, while maintain eye and hand fixation over  
643 a touch screen (ELO Touch Solutions, model 1939L; ASL Eye-Track 6), subjects observed a  
644 visual stimulus (gray circle, 10° diameter, 25° eccentricity) that periodically changed position  
645 from one side of the screen to the other, at regular intervals (*entrainment* epoch; 500, 750, or  
646 1000 ms interval; pseudo-randomly selected on each trial; Figure 1A). After three *entrainment*  
647 intervals the visual stimulus disappeared, and subjects had to continue estimating its position  
648 (left or right) as a function of elapsed time (*maintenance* intervals; Figure 1A). This visuo-  
649 spatial rhythm task is similar to a visual metronome that paces a rhythm which subjects have  
650 to keep internally during the *maintenance* epoch. To quantify the ability of the subjects to  
651 maintain rhythms of different tempos a *go-cue* (disappearance of the hand fixation area) was  
652 presented at the middle of any of the four maintenance intervals (randomly selected, uniform  
653 distribution; Figure 1A). This *go-cue* instructed the subjects to make a reach movement  
654 towards the estimated target position (left or right). It is important to note that this was not an

655 interception task, i.e., once the *go-cue* was presented the non-visible stimulus no longer  
656 changed position. Performance was measured as the proportion of correct responses plotted  
657 as a function of the elapsed time since the initiation of the *maintenance* epoch (Figure 1B).  
658 Visual stimuli and task control was achieved with the Expo software (designed by Peter  
659 Lennie, maintained by Robert Dotson; available at <https://sites.google.com/a/nyu.edu/expo/>).

660

661 *Neural Recordings.* Neural recordings were performed with seven independent movable  
662 microelectrodes (2-3 M $\Omega$ , Thomas Recordings, Giessen, Germany). Electrodes were  
663 advanced in the coronal plane into the supplementary motor area until single unit activity was  
664 obtained in at least one of the electrodes. At each recording site, spikes were isolated online  
665 (Cerebus acquisition system, Blackrock Microsystems, Salt Lake City, UT, USA) and sampled  
666 at 30 KHz. The local field potentials (LFPs) were obtained by filtering the electrode signal at  
667 0.5 to 500 Hz, at a 2 KHz rate. Offline, the signal was down sampled to 1 KHz, and band-pass  
668 filtered to the 2-50 Hz band.

669

670 *Data Analysis.* Analyses were performed with MATLAB 2013b (The Mathworks, Natick, MA,  
671 USA) using custom code in combination with the Chronux Toolbox for the time- frequency  
672 maps (Partha P Mitra and Bokil 2007).

673

674 *Time-Frequency Decomposition.* Spectral estimation was performed using multitaper methods  
675 (Pesaran et al. 2002; P.P. Mitra and Pesaran 1999; Cohen 2014). A 200 ms windows sliding at  
676 5 ms steps was used for the time-frequency maps (one taper was used, 5 Hz bandwidth).

677 Spectrogram power was normalized by dividing each frequency and time bin by the average  
678 power in a 500 ms *baseline* window before trial initiation.

679

680 *Single Trial Analysis.* To characterize how the amplitude of the gamma oscillations is  
681 modulated over time, we averaged the normalized spectrograms over the low gamma band  
682 frequencies (30-40 Hz). Narrow-band filtering with analytic envelopes and complex Morlet  
683 wavelet convolution yielded similar results. Gamma bursts were defined as the period of time  
684 in which gamma amplitude exceeded the 90<sup>th</sup> percentile of overall activity for at least 100 ms  
685 (i.e. for at least 4 cycles of the gamma oscillations).

686

687 *Classification of correct and error trials.* A logistic function was used to identify correct and  
688 error trials:

689

690

$$p(\text{correct}) = \frac{1}{1 + e^{-(\beta_0 + t_1\beta_1 + t_2\beta_2 + \dots + t_n\beta_n)}}$$

691 were  $t_1$  correspond to the gamma amplitude in the first time-bin,  $t_2$  to the amplitude on second  
692 time bin, and so on (10 time bins per interval, 35 time-bins for each trial). Thus, the predicted  
693 behavior arises from a linear combination of the gamma activity used to fit the logistic function.  
694 The classifier accuracy was measured on 100 trials (50 correct and 50 error trials; randomly  
695 selected) not used in fitting the logistic function. Fitting and testing was repeated 100 times,  
696 randomly selecting the test trials. For the cumulative window classifier (Figure 4B, green line)  
697 we used the gamma amplitude on the first time-bin and then tested the accuracy of decoding,  
698 then we added the data of the second time-bin and recalculated accuracy, and so on until the  
699 last time-bin. In a second approach that we called “sliding window”, a window of 5 time-bins

700 were used to fit the classifier and calculate accuracy. This window moved across the trial to  
701 calculate accuracy as a function of elapsed time (Figure 4B, blue line).  
702  
703 *Spike-Triggered Average (STA)*. To estimate the synchronization between the spikes and the  
704 simultaneously recorded LFP, 200 ms windows centered on each spike were analyzed (P.  
705 Fries 2001; Denker et al. 2011). The average LFP in these windows were computed and  
706 normalized peak-to-valley to values between 0 and 1. This procedure was applied before  
707 spectral decomposition of the STA (Figure 8A, power spectrum), allowing the comparison of  
708 spectral density maintaining the same maximum amplitude across conditions (*baseline*,  
709 *entrainment* and *maintenance* epochs). To assess statistical significance, we performed a  
710 factorial ANOVA with the factors *condition* (*baseline*, *entrainment*, *maintenance*), and  
711 *frequency* (alpha, beta, gamma), where the dependent variable was the average amplitude  
712 between 6 to 10 Hz for alpha, 15 to 24 Hz for beta and 30 to 40 Hz for gamma. This analysis  
713 demonstrated that the average power of the STA over the gamma band was significantly larger  
714 during *entrainment* and *maintenance*, as compared to the baseline period ( $p < 0.01$ ; Figure 8B).  
715 We normalized the amplitude of the LFP traces surrounding each spike to account for the  
716 increase in gamma amplitude with total elapsed time.  
717  
718 *Coherence between simultaneously recorded electrodes*. To assess the locality of the  
719 observed LFP oscillations we estimated the phase clustering between the LFPs in pairs of  
720 simultaneously recorded electrodes. We used the time series of all trials recorded while the  
721 monkeys performed the task. For each electrode pair, we band-pass filtered the signal (30-40  
722 Hz) and estimated the analytic envelope to obtain the instantaneous phase. Then, for each

723 time point we estimated the difference angles between signals in the complex plane. The  
724 coherence was defined as the length of the average vector of all difference angles, a  
725 procedure that results in magnitudes between 1 (all difference angles are aligned to the same  
726 direction) and zero (random distribution) (Cohen 2014). To quantify how coherence decreased  
727 as a function of electrode separation we grouped the distance variable into 50 bins containing  
728 the same number of observations per bin. A linear regression was then applied to these data  
729 (Figure 8D).
